# Supplementary material for: Gene discovery by chemical mutagenesis and whole-genome sequencing in Dictyostelium
Source: PubMed Central journal article supplement — Genome Res. 2016 Sep;26(9):1268–76. doi: 10.1101/gr.205682.116 (PMC5052037; doi:10.1101/gr.205682.116), 2016-09
Supplement: supp_gr.205682.116_Supplementary_Fig_S1.pdf [file supp_gr.205682.116_Supplementary_Fig_S1.pdf]

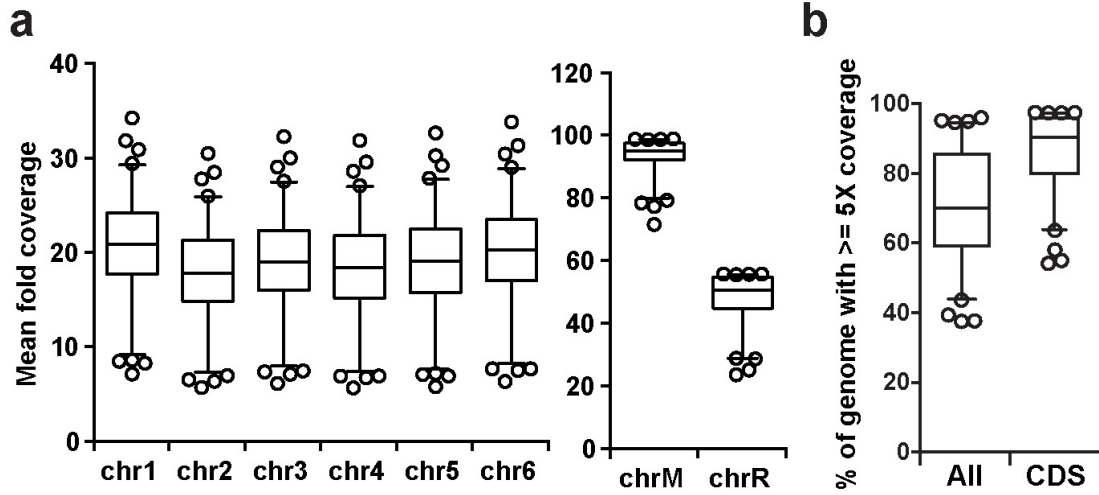

**Supplementary Figure S1. Fold coverage of mapped sequence reads.** (a) The sequence fold coverage of chromosomes 1-6, and the ribosomal and mitochondrial DNAs ( $n = 85$ , notice the different y-axis scales). (b) The proportion (%) of DNA covered by  $\geq 5$  reads (y-axis) in the entire genome (All, x-axis) and in the coding-DNA sequence (CDS, x-axis);  $n = 85$ . The edges of the boxes represent the 75<sup>th</sup> and 25<sup>th</sup> percentiles. The lines in the middle of the boxes represent the medians. Error bars are the 95% confidence intervals. The empty circles are outliers.
