# Supplementary material for: Gene discovery by chemical mutagenesis and whole-genome sequencing in Dictyostelium
Source: PubMed Central journal article supplement — Genome Res. 2016 Sep;26(9):1268–76. doi: 10.1101/gr.205682.116 (PMC5052037; doi:10.1101/gr.205682.116), 2016-09
Supplement: supp_gr.205682.116_Supplementary_Fig_S2.pdf [file supp_gr.205682.116_Supplementary_Fig_S2.pdf]

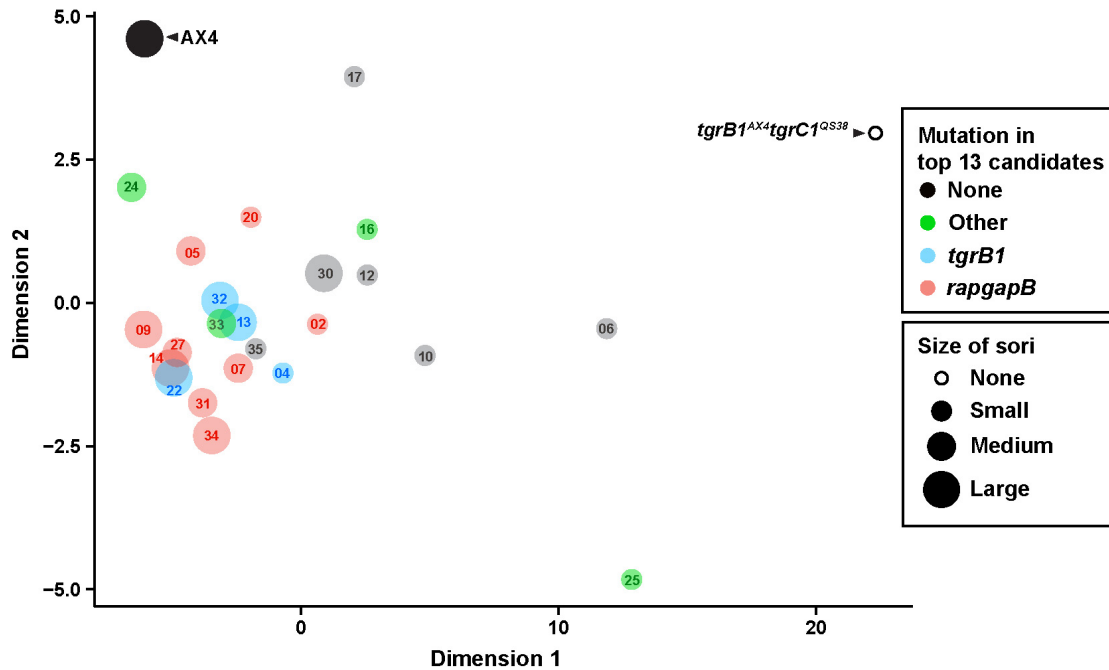

**Supplementary Figure S2. A multidimensional scaling plot of *Dictyostelium* strains based on their developmental morphology.** We plotted the morphological distance between the parental strains (*AX4* and *tgrB1<sup>AX4</sup>tgrC1<sup>QS38</sup>*) and 23 chemically mutagenized strains carrying suppression mutations of the *tgrB1-C1* mismatch phenotype. We also measured the size of sori in fruiting bodies of individual strains as indicated by the increasing radius of the circles in the legend. We plotted *tgrB1<sup>AX4</sup>tgrC1<sup>QS38</sup>* as an empty circle (no fruiting bodies). The top 13 candidate genes in the screen for suppression of the *tgrB1-C1* mismatch are listed in Figure 3 and Supplementary Table 1. The colors indicate whether the individual strains carry chemically induced mutations in *rapgapB* (red), *tgrB1* (blue), any of the other 11 candidate genes (green), or none of them (grey). *AX4* and *tgrB1<sup>AX4</sup>tgrC1<sup>QS38</sup>* are shown in black. Numbers in the circles represent strain numbers of individual mutants.
