# Supplementary material for: Gene discovery by chemical mutagenesis and whole-genome sequencing in Dictyostelium
Source: HighWire-hosted journal article supplement (doi:10.1101/gr.205682.116), 2016-06-15
Supplement: Supplementary_Table_S1.docx [file Supplementary_Table_S1.docx]

| **Supplementary Table S1. Candidate genes and chemically-induced mutations** | | |
| --- | --- | --- |
| **Gene name** | **Mutations** | **Phenotype** |
| *rapgapB* | M1I, Q44*, Q45*, H51Y, T84I, P112L, P123S, E140K, A157V,C161Y, G191S, G191D(3a), Q221*, H230Y, P236L, P360S, G382D | Suppression of *tgrB1-C1* mismatch |
| *tgrB1* | G179D, G275D(2a), G307D(3a), L331F, S419F, L846F | Suppression of *tgrB1-C1* mismatch |
| *colA* | S1547P, L3004V, V3549I, P4234S, P8396S | Suppression of *tgrB1-C1* mismatch |
| *irlB-1* | D220N, I944T, S947T, P950T, N996N (AAT>AAC) | Suppression of *tgrB1-C1* mismatch |
| *lysA* | S690N, P835S, R1210K, G1360D | Suppression of *tgrB1-C1* mismatch |
| *cpras2* | M326I, S1425N, G2451D | Suppression of *tgrB1-C1* mismatch |
| *DDB_G0270488* | S634L, V896I, G1205S | Suppression of *tgrB1-C1* mismatch |
| *DDB_G0271904* | S34N, G78D, G478S | Suppression of *tgrB1-C1* mismatch |
| *DDB_G0277749* | A575T, G1277D, D1462N | Suppression of *tgrB1-C1* mismatch |
| *DDB_G0277997* | T368I, G1629D, V1826I | Suppression of *tgrB1-C1* mismatch |
| *DDB_G0285705* | T458I, P475S, V871I | Suppression of *tgrB1-C1* mismatch |
| *DDB_G0273247* | P406S, K1136K (AAG>AAA), C1152Y | Suppression of *tgrB1-C1* mismatch |
| *DDB_G0273385* | E271Q, G442D, V994A | Suppression of *tgrB1-C1* mismatch |
| *hemA* | G309D, A455T, A536T, A537T | Light resistance |
| *tor* | T1153I, A1967T | Aggregation defects |
| *piaA* | G1002D | Aggregation defects |
| *ripA* | Q570* | Aggregation defects |
| *nfaA* | A286V | Aggregation defects |
| *myoG* | G2281D | Aggregation defects |
| *pakC* | W385* | Aggregation defects |
| *secG* | A593T | Aggregation defects |
| *cdk8* | Deletion of the coding DNA nucleotide 1212 | Aggregation defects |
| *mhcA* | E1716K | Aggregation defects |
| *mlkA* | G89D | Aggregation defects |
| *pde4* | M595I | Aggregation defects |
| *pikC* | S227N | Aggregation defects |
| *pkaC* | Q210* | Aggregation defects |
| *xacA* | P449S | Aggregation defects |
| *splA* | A640T, G2196D | Aggregation defects |
| *DDB_G0275861* | Q787*, D2349N | Aggregation defects |
| *DDB_G0283339* | V490I, S955N-S958N (double mutations occurred in one allele) | Aggregation defects |
| *DDB_G0283893* | D3782N, G4369D | Aggregation defects |

aThe numbers in parenthesis are the number of observed independent mutation events.
